# 1 **Within-host evolutionary dynamics and tissue compartmentalization during acute SARS-CoV-2** 2 **infection**

3  
4 Mireille Farjo<sup>1</sup>, Katia Koelle<sup>2</sup>, Michael A. Martin<sup>2,3</sup>, Laura L. Gibson<sup>4</sup>, Kimberly K.O. Walden<sup>5</sup>, Gloria  
5 Rendon<sup>5</sup>, Christopher J. Fields<sup>5</sup>, Fadi G. Alnaji<sup>1</sup>, Nicholas Gallagher<sup>6</sup>, Chun Huai Luo<sup>6</sup>, Heba H.  
6 Mostafa<sup>6</sup>, Yukari C. Manabe<sup>7,8</sup>, Andrew Pekosz<sup>8</sup>, Rebecca L. Smith<sup>9,10,11</sup>, David D. McManus<sup>12</sup>,  
7 Christopher B. Brooke<sup>1,9\*</sup>

8  
9 <sup>1</sup> Department of Microbiology, University of Illinois at Urbana-Champaign;

10 <sup>2</sup> Department of Biology, Emory University;

11 <sup>3</sup> Population Biology, Ecology, and Evolution Graduate Program, Emory University;

12 <sup>4</sup> Division of Infectious Diseases and Immunology, Departments of Medicine and Pediatrics,  
13 University of Massachusetts Medical School;

14 <sup>5</sup> High-Performance Biological Computing at the Roy J. Carver Biotechnology Center, University  
15 of Illinois at Urbana-Champaign;

16 <sup>6</sup> Division of Medical Microbiology, Department of Pathology, Johns Hopkins University School  
17 of Medicine;

18 <sup>7</sup> Division of Infectious Disease, Department of Medicine, Johns Hopkins School of Medicine;

19 <sup>8</sup> W. Harry Feinstone Department of Molecular Microbiology and Immunology, Johns Hopkins  
20 Bloomberg School of Public Health;

21 <sup>9</sup> Carl R. Woese Institute for Genomic Biology, University of Illinois at Urbana-Champaign;

22 <sup>10</sup> Department of Pathobiology, University of Illinois at Urbana-Champaign;

23 <sup>11</sup> Carle Illinois College of Medicine, University of Illinois at Urbana-Champaign;

24 <sup>12</sup> Division of Cardiology, University of Massachusetts Medical School

25 \* Corresponding author (cbrooke@illinois.edu)

## 26 27 **Abstract:**

28 The global evolution of SARS-CoV-2 depends in part upon the evolutionary dynamics within  
29 individual hosts with varying immune histories. To characterize the within-host evolution of acute  
30 SARS-CoV-2 infection, we deep sequenced saliva and nasal samples collected daily from  
31 immune and unvaccinated individuals early during infection. We show that longitudinal sampling  
32 facilitates high-confidence genetic variant detection and reveals evolutionary dynamics missed  
33 by less-frequent sampling strategies. Within-host dynamics in both naïve and immune  
34 individuals appeared largely stochastic; however, we identified clear mutational hotspots within  
35 the viral genome, consistent with selection and differing between naïve and immune individuals.  
36 In rare cases, minor genetic variants emerged to frequencies sufficient for forward transmission.  
37 Finally, we detected significant genetic compartmentalization of virus between saliva and nasal  
38 swab sample sites in many individuals. Altogether, these data provide a high-resolution profile  
39 of within-host SARS-CoV-2 evolutionary dynamics.

## 40 41 **Introduction:**

42 The large-scale sequencing and phylogenetic analyses of clinical samples during the SARS-  
43 CoV-2 pandemic have captured global evolutionary dynamics of the virus with unprecedented  
44 speed and resolution. However, our understanding of viral evolutionary dynamics within  
45 individual infected hosts remains limited. Most studies of SARS-CoV-2 within-host evolution  
46 have focused on chronic infections of immunocompromised individuals, as these patients are  
47 more amenable to repeated, longitudinal sampling. It has been hypothesized that chronic  
48 infections promote the emergence of novel viral variants by providing a combination of  
49 prolonged time for replication and relatively weak immune selection that promotes the

50 emergence of variants with increased fitness to high frequency within the host (Avanzato et al.,  
51 2020; Baang et al., 2021; Corey et al., 2021). Persistent replication within immunocompromised  
52 individuals treated with convalescent sera or therapeutic monoclonal antibodies has also been  
53 identified as a potential source of antigenically novel variants (Choi et al., 2020; Kemp et al.,  
54 2021; Truong et al., 2021).

55  
56 Previous studies of SARS-CoV-2 within-host evolutionary dynamics during acute infection of  
57 immunocompetent hosts observed low within-host diversity in SARS-CoV-2 populations, with  
58 most specimens containing 15 or fewer intra-host single-nucleotide variants (iSNVs) (Braun et  
59 al., 2021; Lythgoe et al., 2021; Tonkin-Hill et al., 2021; Valesano et al., 2021). Studies of  
60 household transmission reaffirm that within-host diversity is low and that iSNVs are rarely  
61 transmitted between members of a household (Braun et al., 2021; Lythgoe et al., 2021;  
62 Valesano et al., 2021). Altogether, these data suggest that acute infections typically exhibit low  
63 overall levels of within-host genetic diversity and that the selection-driven emergence of iSNVs  
64 to high frequency during acute infection is likely rare. However, our understanding of within-host  
65 evolutionary dynamics has been hampered by the absence of high-resolution time course data  
66 within individuals.

67  
68 The extent to which pre-existing immunity, elicited either through vaccination and/or prior  
69 infection, influences the within-host evolution of SARS-CoV-2 is poorly understood. For two-  
70 dose vaccinations, it remains unclear whether administration of a single dose without a follow-  
71 up may create an evolutionary sandbox where moderate immune selection in the absence of  
72 rapid clearance can drive the emergence of immune-escape variants (Cobey et al., 2021; Saad-  
73 Roy et al., 2021). A similar question has been raised by the emergence of new variants like  
74 Omicron that are able to efficiently replicate in vaccinated individuals where the virus may  
75 accumulate additional immune escape substitutions. Thus, it is important to characterize the  
76 extent of immune selection and potential for escape variant emergence during infections of  
77 immune-competent individuals at differing stages of vaccination.

78  
79 To characterize viral evolutionary dynamics during acute SARS-CoV-2 infection, we sequenced  
80 longitudinal nasal swab and saliva samples collected from 32 students, faculty, and staff at the  
81 University of Illinois at Urbana-Champaign enrolled during the early stages of infection through  
82 an on-campus screening program (Ranoa et al., 2021). This cohort included 20 naive  
83 individuals and 12 individuals with presumed pre-existing immunity to SARS-CoV-2 resulting  
84 from vaccination or prior infection. By taking repeated measures of iSNV frequencies from two  
85 sample sites (mid-turbinate (MT) nasal swab and saliva) within individuals, we were able to  
86 generate high-resolution profiles of iSNV dynamics between tissue compartments and across  
87 time. Our results demonstrate that selection, genetic drift, and spatial compartmentalization all  
88 play important roles in shaping the within-host evolution of SARS-CoV-2 populations.

## 89 90 **Results:**

### 91 *Sample collection*

92 During the 2020-2021 school year, all students, faculty, and staff on the University of Illinois at  
93 Urbana-Champaign campus were required to undergo saliva-based PCR testing for SARS-CoV-  
94 2 at least twice a week (Ranoa et al., 2021). We enrolled individuals who were either (a) within  
95 24 hours of their first positive test result, or (b) within 5 days of exposure to someone else who  
96 tested positive. Daily saliva samples and nasal swabs were collected from each enrolled  
97 participant for up to 14 days. Details on the dynamics of viral shedding in this cohort have been  
98 published previously (Ke et al., 2022a, 2022b; Smith et al., 2021).

99

100 *Optimization and validation of saliva sample sequencing protocol*

101 The saliva-based PCR assay used in this study involves a 30-minute treatment at 95°C which  
102 partially degrades the viral RNA present in the sample and could potentially compromise  
103 sequencing quality (Ranoa et al., 2020, 2021). To address this concern and determine whether  
104 saliva Ct values are predictive of sequencing data quality, we examined sequencing depth  
105 across samples with a range of Ct values. Over a set of 10 samples that spanned a Ct range of  
106 21.63 to 34.34, we observed a clear negative correlation between N gene Ct value and  
107 coverage depth (Adjusted R-squared = 0.4296,  $p = 0.02359$ ) (**Fig 1A**). For Ct values below 28,  
108 we obtained average per-nucleotide read depths of over >10,000 reads, indicating that high  
109 quality sequence data can be obtained from heat-treated samples.

110

111 We next evaluated the relationship between Ct values and the reliability of iSNV detection in  
112 saliva samples. We generated control samples in which RNA isolated from a B.1.1.7 (Alpha)  
113 lineage sample was spiked into a B.1.2 lineage sample at defined frequencies of 50%, 10%,  
114 5%, 2%, and 1%. We normalized both B.1.1.7 and B.1.2. samples to Ct values of 23.6, 26, or 28  
115 based on Ct values prior to mixing. Spike-ins were then divided into replicate samples and  
116 deep-sequenced. We compared the measured frequencies of the 17 characteristic B.1.1.7  
117 SNPs and indels between technical replicates (**Fig 1B**). We detected B.1.1.7-associated  
118 mutations at the expected frequencies for spike-ins at 5% or greater, but frequency estimates  
119 were much noisier for the 1% and 2% spike-ins. The correlation between technical replicates  
120 was also stronger at dilutions above 2% and in samples with a Ct of 23.59 or 26 than in samples  
121 with a Ct of 28. Based off these results, we set a variant calling threshold of 3% and a Ct cutoff  
122 of 28 for analyzing saliva samples.

123

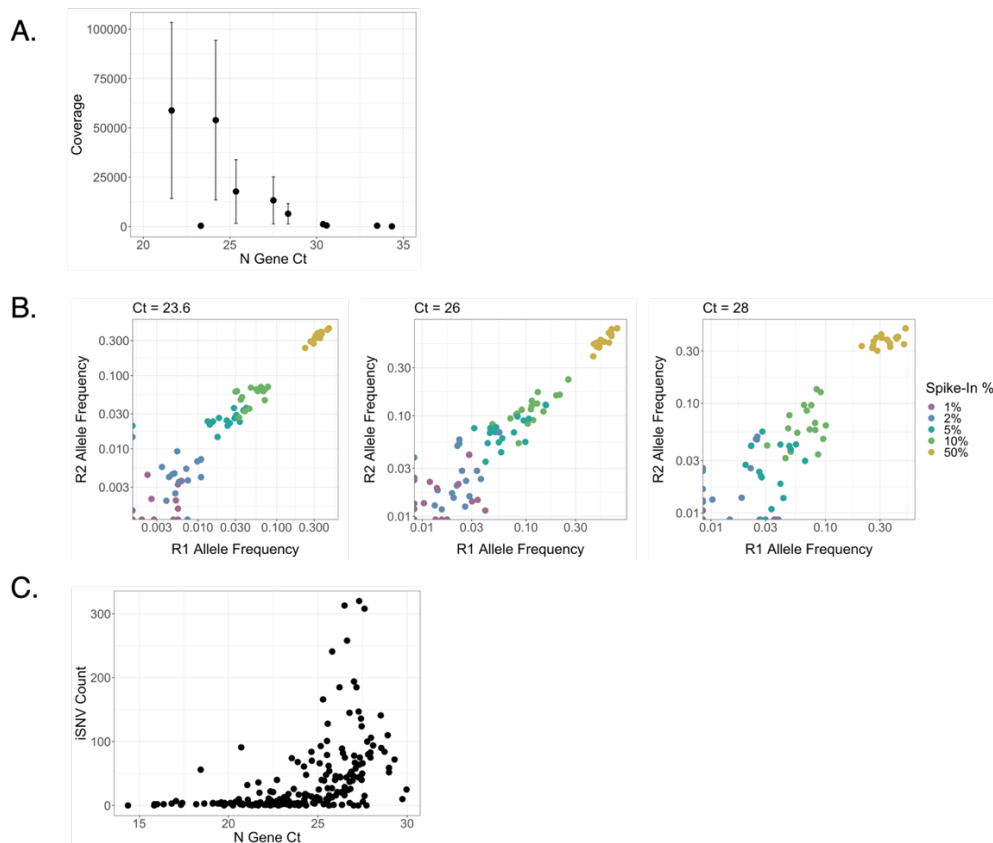

124

125 **Figure 1: Relationship between saliva sample Ct values and sequence quality. (A)** Linear  
126 regression between Ct values of nucleocapsid (N) gene and mean sequence coverage depth.  
127 Error bars represent standard deviation. **(B)** Frequencies of characteristic B.1.1.7 SNPs at Ct  
128 values of 23.6, 26, and 28. B.1.1.7 RNA was spiked into B.1.2 RNA at final percentages ranging  
129 from 1% to 50% and divided between two replicates (R1 and R2). **(C)** Relationship between Ct  
130 of N and total iSNV count in resulting sequences (Spearman's rank correlation,  $\rho = 0.6351$ ,  $p$   
131  $< 0.001$ ).

132  
133 We ranked study participants based on the number of saliva samples with  $Ct < 28$  and the range  
134 of time that these samples covered and selected 20 unvaccinated participants for further study.  
135 We also selected 12 study participants who were either vaccinated (fully or partially; definitions  
136 in methods) or reported a previous positive SARS-CoV-2 PCR test result and had at least one  
137 saliva sample with  $Ct < 30$ . We refer throughout to this group as “immune” as we assume they  
138 mounted some sort of adaptive immune response to vaccination or infection; however, we were  
139 unable to empirically measure immune responses in this study. We chose a higher Ct threshold  
140 for these immune participants because Ct values overall were much higher in this group (Ke et  
141 al., 2022a, 2022b). Across the entire cohort, the number of iSNVs per sample was correlated  
142 with the Ct value of the sample (Spearman's rank correlation,  $\rho = 0.6351$ ,  $p < 0.001$ ), further  
143 demonstrating that high Ct values can contribute to noise in iSNV detection (**Fig 1C**).

#### 144 *Analysis of within-host diversity*

145 We next examined the diversity within and between individual saliva samples, focusing on  
146 iSNVs and short insertions/deletions (indels) present at frequencies between 3-97%, with  
147 coverage depths of  $>1000$  reads. The numbers of iSNVs that fit these criteria varied  
148 substantially between samples, generally spanning values between 1 and 100 at different points  
149 during infection (**Fig 2A,B**). To minimize false positive iSNV calls, we focused on iSNVs that  
150 appeared in at least two saliva samples collected from a given individual across different dates  
151 of infection (shared iSNVs). Numbers of shared iSNVs were similar between participants,  
152 averaging 6.31 shared iSNVs per individual, which aligns with previous assessments (Braun et  
153 al., 2021; Tonkin-Hill et al., 2021; Valesano et al., 2021).

154  
155

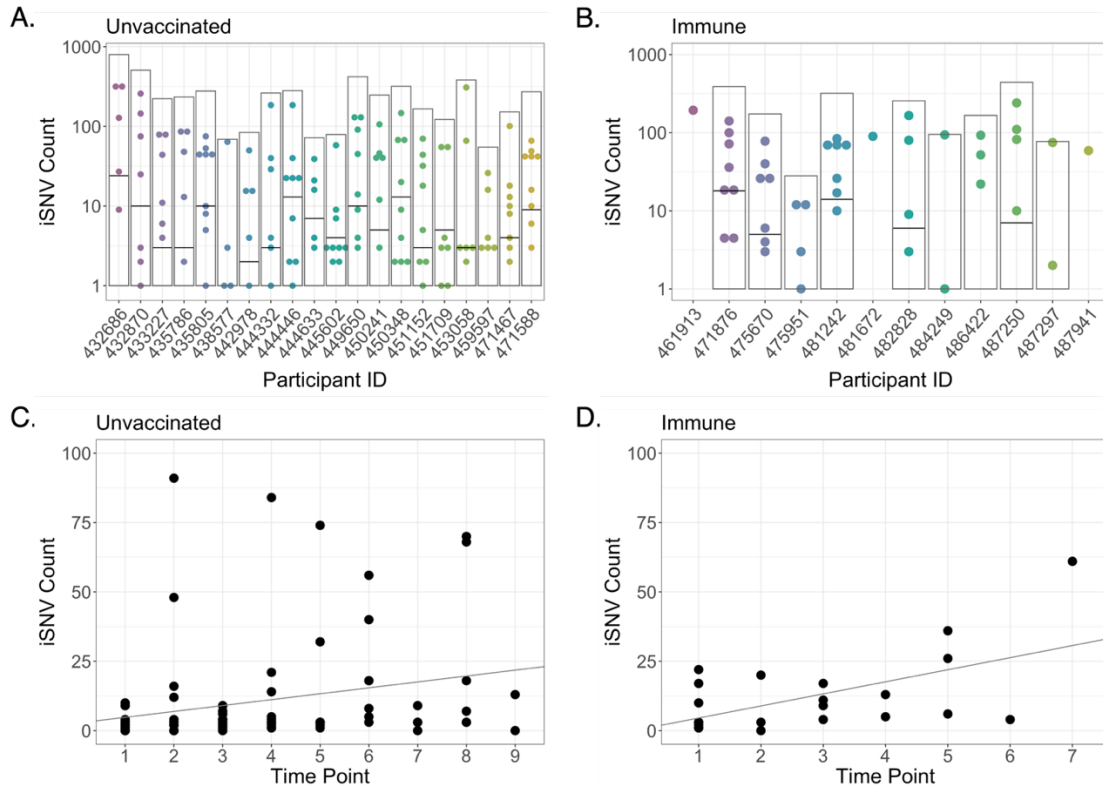

156  
157

158 **Figure 2: Intra-host single nucleotide variant (iSNV) diversity compared between samples**  
 159 **and individuals. (A)** Total iSNV counts for each sample from each unvaccinated participant.  
 160 Light grey boxes indicate total iSNV count for all samples and horizontal black lines indicate  
 161 number of shared iSNVs for each participant. **(B)** iSNV counts for immune participants. **(C)**  
 162 iSNV counts for individual samples with Ct < 25 from naïve participants as a function of number  
 163 of days post-enrollment (Adjusted R-squared = 0.05007, p = 0.02255). Line represents linear  
 164 regression. **(D)** iSNV counts for individual samples with Ct < 25 from immune participants as a  
 165 function of number of days post-enrollment (Adjusted R-squared = 0.2857, p = 0.006359). Line  
 166 represents linear regression.

167

168 Naive participants had lower overall iSNV counts than immune participants, with average variant  
 169 counts of 33.39 and 51.73 respectively (Welch two sample t-test, p = 0.05645) (**Fig 2A,B**).  
 170 However, the higher iSNV counts in immune samples is likely due to higher Ct values, as  
 171 indicated above (unvaccinated average = 23.79, immune average = 25.15, p = 0.007773).  
 172 There was no significant difference in the number of shared iSNVs between the two groups  
 173 (unvaccinated average = 6.65, immune average = 5.56, Welch two sample t-test, p = 0.6734).  
 174 We also observed an upward trend in iSNV counts over time in both groups. To account for the  
 175 impact of high Ct values on artifactual iSNV accumulation, we only considered samples with a  
 176 Ct below 25 in our analysis (we did not restrict the analysis to only shared iSNVs, to avoid  
 177 violating assumptions of independence between data points). We found a stronger correlation  
 178 between iSNV counts and time of sample collection in immune individuals (Adjusted R-squared  
 179 = 0.2857, p = 0.006359) than in naïve individuals (Adjusted R-squared = 0.05007, p = 0.02255),  
 180 but the relationship was significant in both groups (**Fig 2C,D**). These data indicate similar overall  
 181 levels of within-host diversity in naïve and immune individuals, but potentially a higher rate of  
 182 mutant accumulation over time in immune individuals.



183  
184  
185  
186  
187  
188  
189  
190  
191  
192  
193  
194  
195  
196  
197  
198  
199  
200  
201  
202

We next examined the distributions of shared iSNVs across the viral genome for both unvaccinated and immune populations. Since 3 immune individuals only had a single timepoint, and 4 others had no shared iSNVs, we excluded these 7 immune participants from this analysis. We also detected four frameshift mutations (at nucleotide positions 6696, 11074, 15965, and 29051) in many samples at low but consistent frequencies. Given the low likelihood of identical frameshift mutations repeatedly arising and persisting in multiple populations, we concluded that these variants are likely sequencing artifacts and we removed them from the dataset.

After the removal of these variants, we still observed several iSNVs and indels that recurred across multiple naïve individuals, including a t29760c substitution in the 3' UTR region present in 9/20 naïve participants, and several coding substitutions in ORF1ab (**Fig 3A**). In immune individuals, a handful of mutations were shared by pairs of participants (**Fig 3B**). These included a P681H substitution at the S1/S2 cleavage site in the spike protein associated with the B.1.1.7 (Alpha) lineage and mutations (a G→A substitution and a G→GAACA insertion) at nucleotide position 28262, in the untranslated region between the E (Envelope) and N (Nucleocapsid) genes. From our data, we cannot determine whether shared mutations arose independently in multiple participants or were transmitted. Beyond these exceptions, the vast majority of iSNVs were only detected in a single study participant (**Fig S1**).

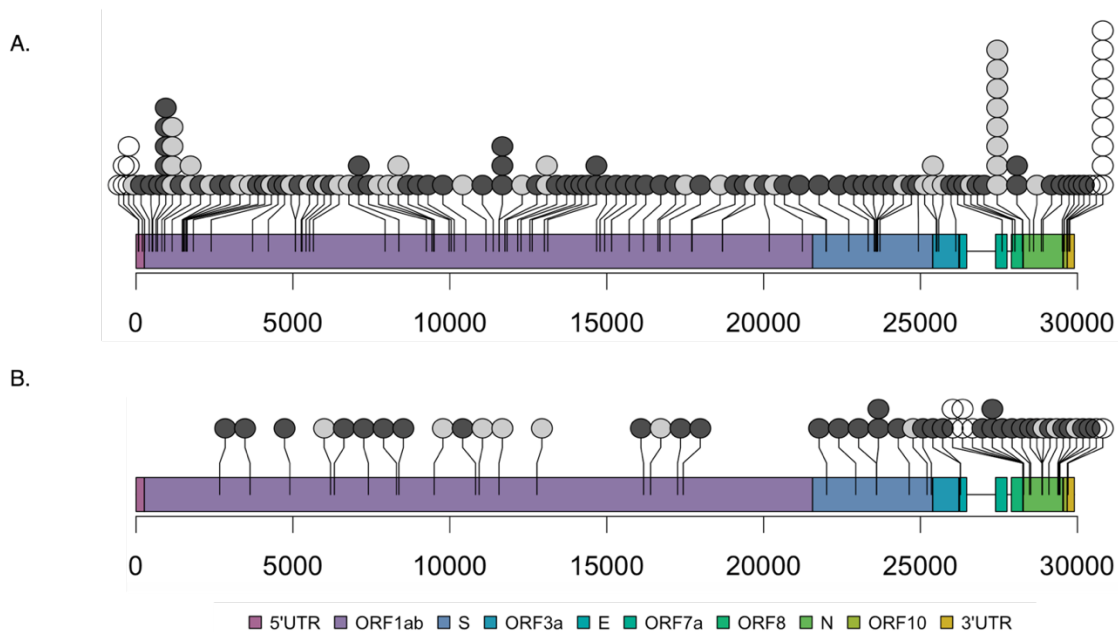

203  
204  
205  
206  
207  
208  
209  
210  
211  
212  
213  
214

**Figure 3: Locations of shared iSNVs across the SARS-CoV-2 genome.** Genome locations of shared iSNVs found in naïve (A) and immune (B) participants. Number of dots at a locus indicate number of participants in which the shared iSNV was detected. Light grey dots indicate synonymous mutations, dark grey dots indicate nonsynonymous mutations, and white dots indicate UTR mutations.

Mutations were not evenly distributed across the viral genome and clear hotspots of accumulation were easily observable. In naïve participants, we observed 6 mutations between ORF1ab positions 402-457 and 4 mutations between spike positions 655-681, near the S1/S2 cleavage site (**Fig 3A**). As indicated above, S:P681H was also observed in two members of the

215 immune cohort. In immune individuals, we observed 3 clusters of mutations in the N gene  
 216 (positions 3-80, 199-204, and 370-391; **Fig 3B**). Mutations in the N gene were enriched in  
 217 immune participants – they made up 31.37% of shared variants in immune individuals but only  
 218 4.29% of shared variants in naïve participants (Fisher’s exact test,  $p < 0.001$ ). This enrichment  
 219 was largely driven by samples from one vaccinated individual, who had 11 shared iSNVs in the  
 220 N gene. However, when the individual was removed from the study set, immune individuals still  
 221 exhibited higher proportions of N iSNVs than naïve individuals (Fisher’s exact test,  $p =$   
 222  $0.03669$ ). This was surprising because the N protein is not targeted by currently licensed  
 223 vaccines. Despite similarities in overall levels of within-host diversity between the two groups,  
 224 there appear to be differences between naïve and immune individuals in the distribution of this  
 225 diversity across the viral genome.

226  
 227 *Compartmentalization between tissue environments*

228 Previous studies revealed that SARS-CoV-2 replication dynamics can be highly discordant  
 229 between saliva and nasal swab samples, suggesting strong compartmentalization of virus  
 230 between different anatomical sites (Ke et al., 2022a, 2022b). To directly evaluate the extent of  
 231 compartmentalization between nasal and saliva-associated tissue sites, we compared iSNV  
 232 frequencies between paired saliva and nasal swab samples over the course of infection in 13  
 233 individuals with high quality sequences for both saliva and nasal samples. We first simply  
 234 compared the frequencies of shared iSNVs present at any frequency in saliva versus nasal  
 235 swab samples (**Fig 4A**). In the absence of compartmentalization, we would expect iSNV  
 236 frequencies to be highly correlated between sample sites. Instead, data points almost  
 237 exclusively fell along the edges of the plot, consistent with substantial compartmentalization  
 238 between sample sites.  
 239

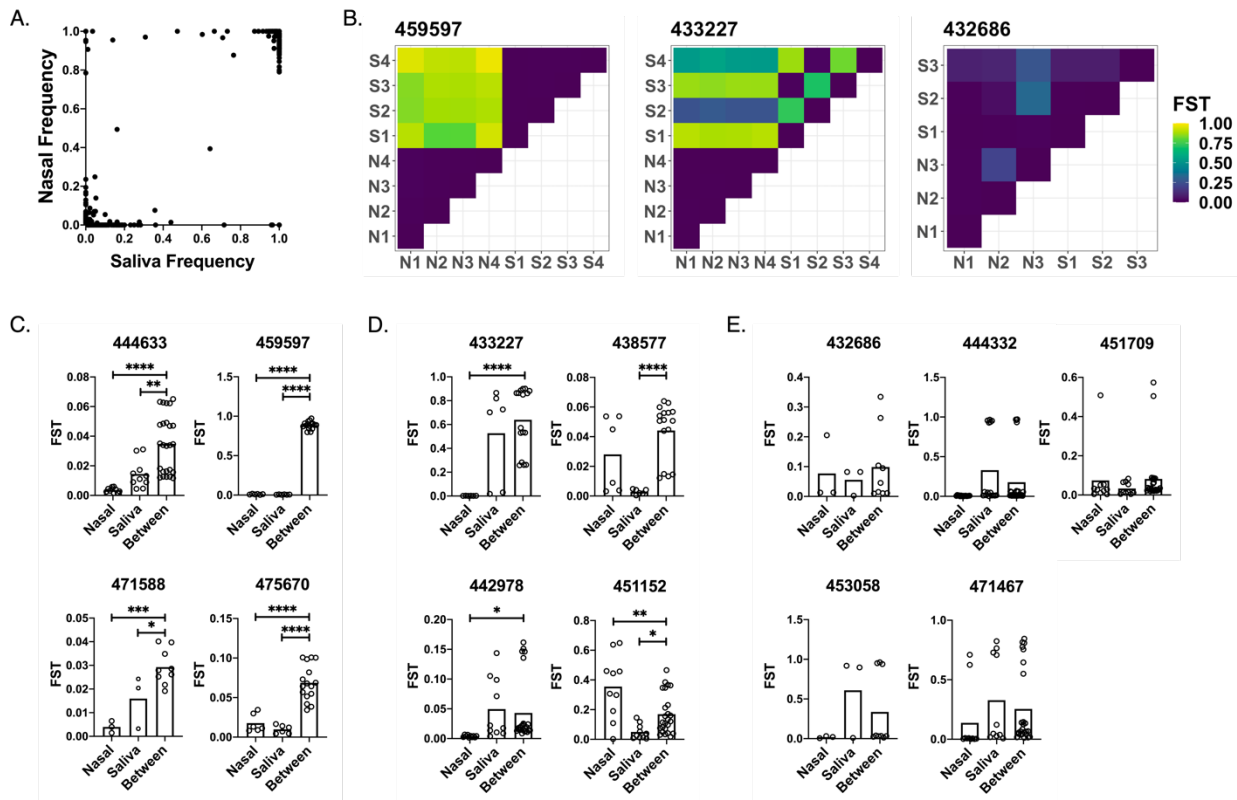

240  
 241

242 **Figure 4: Quantification of genetic compartmentalization of virus between sample sites.**  
243 **(A)** Comparison of iSNV frequencies between matched samples in nasal and saliva  
244 environments. **(B)** Representative heatmaps exemplifying strong (459597), partial (433227),  
245 and insignificant (432686) compartmentalization. Maps show  $F_{ST}$  values between pairs of  
246 samples from nasal (“N”) and/or saliva (“S”) environments (numbered by order of sampling). **(C)**  
247 Participants exhibiting strong compartmentalization (within-nasal and within-saliva  $F_{ST}$  values  
248 are significantly lower than  $F_{ST}$  values from paired nasal-saliva samples). **(D)** Participants  
249 exhibiting partial compartmentalization (one set of within-environment  $F_{ST}$  values is lower than  
250 between-environment  $F_{ST}$  values). **(E)** Participants exhibiting no significant compartmentalization  
251 (neither set of within-environment  $F_{ST}$  values is lower than between-environment  $F_{ST}$  values).  
252 Asterisks indicate levels of significance (\* =  $p < 0.05$ , \*\* =  $p < 0.01$ , \*\*\* =  $p < 0.001$ , \*\*\*\* =  $p <$   
253  $0.0001$ ).  $P$ -values are derived from unpaired  $t$ -tests between each group.

254  
255 To quantify the extent of compartmentalization more precisely, we calculated fixation indices  
256 ( $F_{ST}$ ) within and between environments (**Fig 4B,C,D**). The fixation index measures the ratio of  
257 allele frequency variation between sub-populations versus the variation in the total population.  
258  $F_{ST}$  values range from 0 to 1, and values closer to 1 indicate higher levels of variation between  
259 populations. In 7 out of 13 individuals (and overall), the between-environment  $F_{ST}$  values were  
260 significantly higher than the within-nasal  $F_{ST}$  values, reflecting compartmentalization. In 6 out of  
261 13 individuals (but not overall), the between-environment  $F_{ST}$  values were significantly higher  
262 than the within-saliva  $F_{ST}$  values (**Fig 4C,D,E**), again indicative of genetic compartmentalization  
263 between tissue compartments.

264  
265 Study participants fell into three subcategories: (1) higher variation between nasal and saliva  
266 environments than within either environment, consistent with strong tissue compartmentalization  
267 (**Fig 4B,C**); (2) higher variation between environments than within one environment, consistent  
268 with partial compartmentalization (**Fig 4B,D**); and (3) no difference in between-environment  
269 versus within-environment variation, consistent with the absence of significant  
270 compartmentalization (**Fig 4B,E**). There was only one instance (participant 451152) where  
271 within-environment  $F_{ST}$  values were significantly higher than between-environment  $F_{ST}$  values  
272 (**Fig 4**). Our data suggest a significant degree of genetic compartmentalization between tissue  
273 environments present in most (8/13), but not all, participants examined.

274  
275 *Within-host evolutionary dynamics*  
276 Our dense longitudinal sampling allowed us to examine the evolutionary forces shaping SARS-  
277 CoV-2 populations over the course of acute infection. We first compared numbers of  
278 nonsynonymous to synonymous mutations (within a frequency range of 0.03 to 0.97, including  
279 both shared and unshared iSNVs) for each saliva sample from each participant (**Fig 5A,B**). We  
280 normalized nonsynonymous and synonymous mutation counts based on estimates of total  
281 numbers of nucleotide positions across the SARS-CoV-2 genome where a substitution would  
282 have a protein-coding effect or a silent effect, respectively. We did not detect any significant  
283 temporal trend in dN/dS ratios in either unvaccinated or immune individuals (**Fig 5A,B**). Overall,  
284 dN/dS ratios were significantly higher in immune individuals compared with naive individuals,  
285 with mean values of 3.411 and 2.664, respectively (Welch two sample  $t$ -test,  $p = 0.02966$ ) (**Fig**  
286 **5C**).

287  
288 While there is not a clear relationship between dN/dS ratios obtained from individual related  
289 populations and the evolutionary forces acting on those populations (Kryazhimskiy and Plotkin,  
290 2008), our data clearly show an enrichment for nonsynonymous iSNVs within SARS-CoV-2



291 infected hosts that is more pronounced within immune individuals. This pattern may reflect  
292 positive selection occurring within immune individuals; alternatively, it may reflect higher levels  
293 of genetic drift in immune individuals (potentially due to lower overall viral loads) and the  
294 resulting inability of purifying selection to act as efficiently in these individuals.  
295

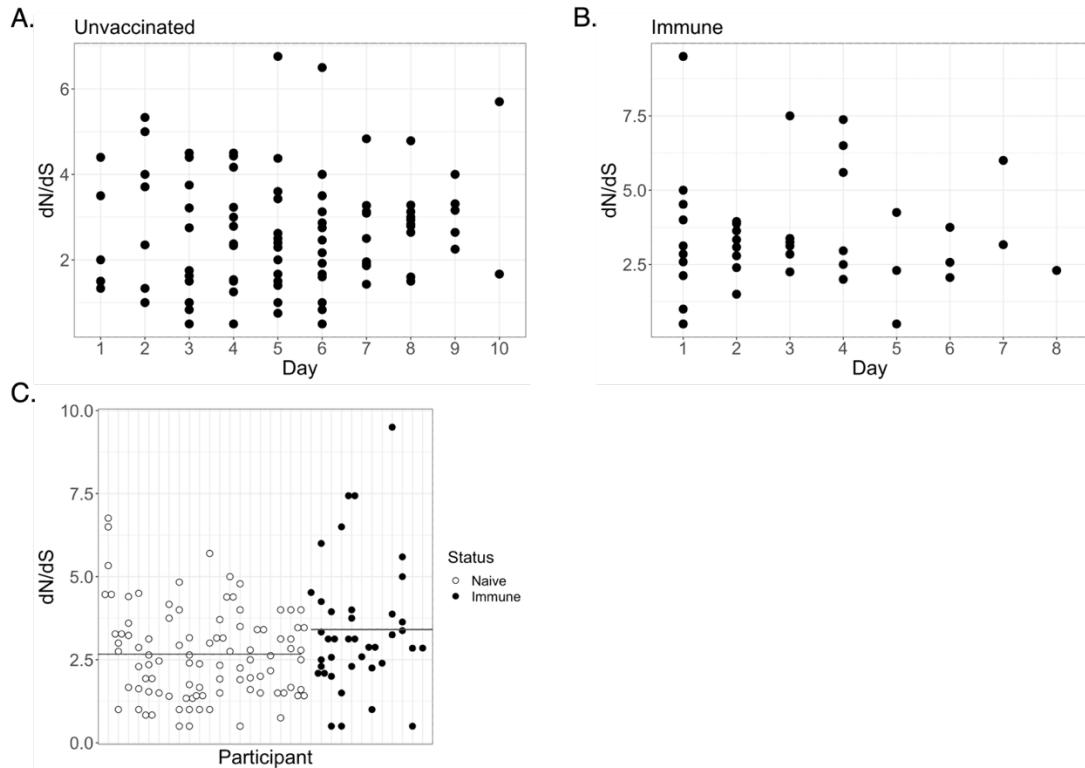

296  
297

298 **Figure 5: dN/dS ratios significantly differ between naïve and immune individuals. (A)**  
299 **dN/dS values for all unvaccinated participants over time. (B) dN/dS values for all immune**  
300 **participants over time. (C) Comparison between dN/dS values for unvaccinated and immune**  
301 **participants (unvaccinated mean = 2.664, immune mean = 3.411,  $p = 0.02966$ ).**  
302

303 To look for signs of potential positive selection acting on specific sites in the viral genome, we  
304 examined changes in the frequencies of recurring iSNVs over time. We plotted all detected  
305 instances of these shared iSNVs, even if they fell outside of the frequency range of 3% to 97%  
306 or fell below our chosen depth threshold of 1000 reads. Overall, the longitudinal dynamics of  
307 many iSNVs in both unvaccinated and immune individuals appeared highly stochastic,  
308 consistent with genetic drift and the absence of strong selection (Figs 6,7; S2,S3). Many iSNVs  
309 detected at high frequency at one or more timepoints fell below the limit of detection (LOD) at  
310 others within the same individual. In several of these cases, two or more iSNVs maintained  
311 highly similar frequencies over the course of infection, suggesting linkage (e.g. ORF1ab:V3261F  
312 and N:P67S in participant 451709; or UTR:t76a and UTR:t78g in participant 471588) (Fig  
313 6A,B). The extreme fluctuations in frequency observed for some collection days may be  
314 explained in part by variation in the quality of population sampling associated with sample  
315 collection.  
316

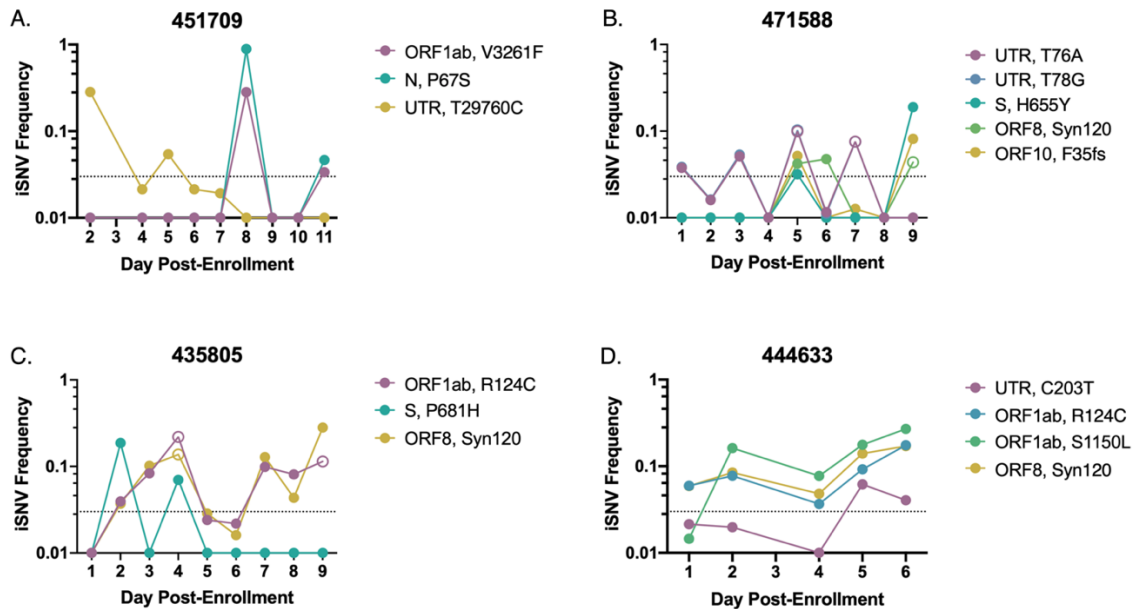

317  
318

319 **Figure 6: iSNV dynamics over time in saliva from naïve individuals.** Frequency tracking of  
320 selected iSNVs from unvaccinated participants 451709 (A), 471588 (B), 435805 (C), and  
321 444633 (D). Dashed line marks frequency threshold of 0.03. Unfilled points mark iSNVs with  
322 read depths below the threshold of 1000 reads.

323

324 While most recurrent iSNVs did not appear to be under strong selection in naïve individuals, we  
325 observed several examples of variants that exhibited consistent patterns of emergence or  
326 decline over the course of acute infection that could be indicative of selection. We observed two  
327 ORF1ab substitutions (R124C and S1150L) in saliva that exhibited dynamics consistent with  
328 positive selection (**Fig 6C,D**). In the case of ORF1ab:R124C, these dynamics were observed  
329 across multiple individuals (**Fig S2**). Additionally, in nasal samples, we observed a substitution  
330 at ORF1ab:P5402H that emerged to near-fixation over the course of infection (**Fig S4**).  
331 However, across the global SARS-CoV-2 tree, these substitutions are observed either  
332 sporadically or not at all, suggesting the absence of positive selection at the between-host scale  
333 (**Fig S5**).

334

335 In participant 471588, the P.1. lineage-associated substitution S:H655Y showed up just above  
336 the LOD at day 5, dropped below the LOD, then re-emerged at over 10% on day 9 post-  
337 enrollment (**Fig 6B**). Another spike substitution associated with multiple variants of concern  
338 (Saxena et al., 2022, 2020a), S:P681H, was observed to emerge in participant 435805 on days  
339 2 and 4, before ultimately falling back below the LOD. The within-host transience of a mutation  
340 associated with increased fitness at the global scale highlights how within-host evolutionary  
341 trends can diverge from global trends. Further illustrating the strength of genetic drift in these  
342 populations, we observed several cases in which synonymous mutations (which we assume to  
343 be neutral) rose to higher frequencies over the course of infection: e.g. the ORF1ab:1717  
344 substitution in participant 435786 and the ORF1ab:1668 substitution in participant 451152 (**Fig**  
345 **S2**).

346

347 Overall, these data suggest that in a subset of acute infections, positive selection may be driving  
348 the emergence of specific iSNVs, but not generally to high enough frequencies to reliably

349 transmit given the narrow transmission bottlenecks observed across multiple studies (Braun et  
350 al., 2021; Martin and Koelle, 2021; Valesano et al., 2021).

351  
352 We did not observe any sweeps of antigenically significant spike substitutions in our small  
353 cohort of immune participants, suggesting that spike-based vaccination does not impose strong  
354 immune selection on the viral populations sampled over the course of acute infection (**Fig 7,**  
355 **S3**). The only recurrent, antigenically significant spike iSNV that we observed within our immune  
356 cohort resulted in a K458N substitution in the receptor binding domain (RBD), a residue that has  
357 been previously associated with monoclonal antibody (mAb) escape (**Fig 7A**) (Harvey et al.,  
358 2021; Liu et al., 2021b). This iSNV remained steady at a low frequency between 3% and 10%  
359 over the course of infection however, suggesting the absence of a strong selective advantage  
360 and low probability of forward transmission.  
361

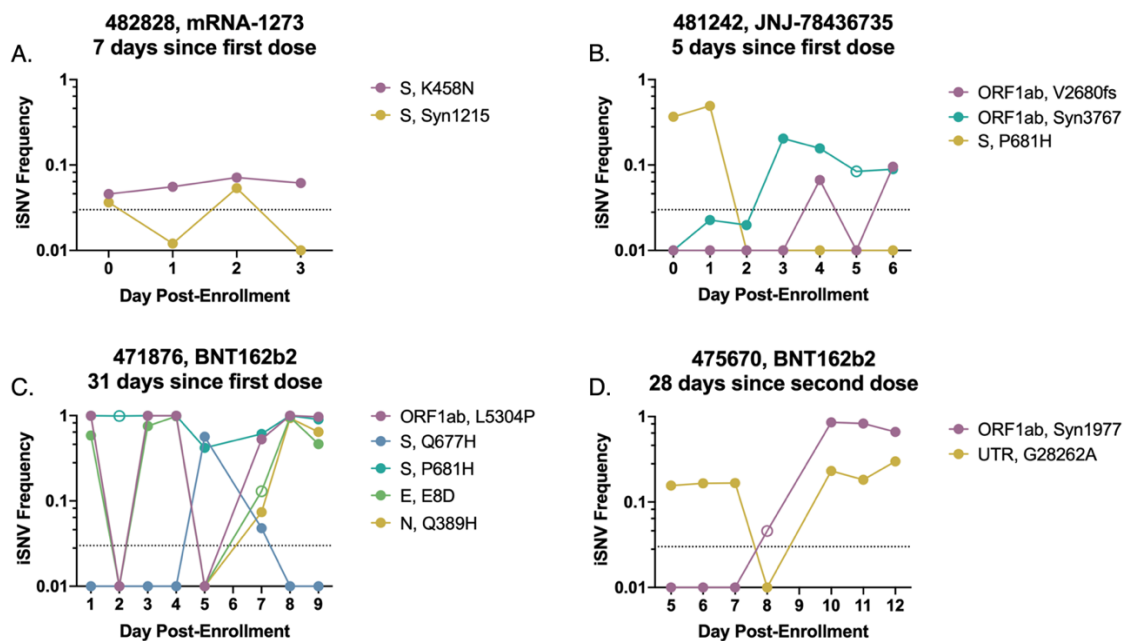

362  
363  
364 **Figure 7: iSNV dynamics over time in saliva from vaccinated individuals.** Frequency  
365 tracking of selected iSNVs from immune participants 482828 (newly vaccinated) (A), 481242  
366 (newly vaccinated) (B), 471876 (partially vaccinated) (C), and 475670 (fully vaccinated) (D).  
367 Dashed line marks frequency threshold of 0.03. Unfilled points mark iSNVs with read depths  
368 below the threshold of 1000 reads. Panel headings indicate vaccine received and time between  
369 enrollment and last vaccine dose.

370  
371 Outside of the established antigenic sites, we observed interesting dynamics near the S1/S2  
372 cleavage site in immune individuals. In participant 481242, S:P681H was observed at middle  
373 frequencies on days 1 and 2 post enrollment but dropped below the LOD by day 3 and  
374 remained undetectable in later timepoints, suggesting a sweep by an S:P681 revertant (**Fig 7B**).  
375 In participant 471876, S:P681H was at or near fixation over the first four days of sampling,  
376 dropped in frequency on days 5 through 7, and then returned to near-fixation at day 8 (**Fig 7C**).  
377 On the two days where S:P681H dropped below 90%, a nearby spike substitution, Q677H,  
378 emerged to high frequency before dropping back below the LOD on days 8 and 9. The co-  
379 occurrence of the dip in S:P681H frequency with the emergence of S:Q677H and subsequent

380 reversal are consistent with competition between these two substitutions. Both substitutions  
381 have proliferated at the global scale, suggesting that in some cases within-host and global  
382 dynamics may be aligned (Colson et al., 2022; Ghosh et al., 2021; Hodcroft et al., 2021; Saxena  
383 et al., 2022). Critically, S:Q677H peaked at a time (day 5 post-enrollment) when this participant  
384 was still viral culture positive (see figure 1 in (Ke et al., 2022b)), indicating the potential for this  
385 *de novo* variant to be successfully transmitted.

386  
387 Overall, we did not detect obvious signs of antibody-mediated immune selection within immune  
388 individuals and found that iSNV frequencies often appeared to vacillate stochastically, like what  
389 was observed in naïve individuals. In participant 471876, several iSNVs (ORF1ab:L5304P,  
390 E:E8D, N:Q389H) fluctuated between fixation and frequencies below the LOD over the course  
391 of infection (**Fig 7C**). Additionally, in participant 475670, we observed a synonymous mutation  
392 (ORF1ab:Syn1977) rapidly rise to fixation (**Fig 7D**). However, it is hard to ascribe all observed  
393 dynamics entirely to genetic drift. Our observations of wild-type reversion and competition  
394 between iSNVs at the S1/S2 cleavage site (**Fig 7B,C**) suggest that selection may drive the  
395 within-host fluctuations of iSNVs at non-antigenic sites during acute infection of some immune  
396 individuals.

397  
398 Finally, in keeping with our compartmentalization analysis, we found that frequencies of shared  
399 iSNVs in nasal swab samples over the course of infection often varied from the dynamics  
400 observed in saliva samples (**Fig S4**). Some of these differences arose from the lack of detection  
401 of a mutation in a certain environment, and some resulted when an iSNV that fluctuated in one  
402 environment was fixed in the other—for example, S:Y145del in participant 450241 was fixed in  
403 all nasal samples and was therefore only called as an iSNV in saliva samples (**Fig S2,4**).  
404 Following the trend observed in saliva samples, iSNV dynamics in nasal swab samples were  
405 generally stochastic, with only rare instances of dynamics consistent with selection.

#### 406 407 **Discussion:**

408 By analyzing longitudinal samples collected daily over the course of acute infection, we  
409 captured a high-resolution temporal profile of SARS-CoV-2 within-host dynamics in humans. In  
410 general, we observed little evidence of strong selection acting on within-host viral populations in  
411 our cohort, consistent with previous reports (Braun et al., 2021; Tonkin-Hill et al., 2021;  
412 Valesano et al., 2021). This was true even within our group of vaccinated or previously infected  
413 individuals, mirroring a previous study of influenza virus that failed to detect the emergence of  
414 antigenic variants during infection of immune individuals (Debbink et al., 2017). These data  
415 suggest that respiratory viruses like SARS-CoV-2 and influenza virus may be able to replicate at  
416 some mucosal sites with minimal restriction by neutralizing antibodies, even within individuals  
417 with robust systemic antibody responses.

418  
419 While signs of strong positive selection were rare in this cohort, we did identify a handful of  
420 nonsynonymous substitutions (S:Q677H, N:P67S, ORF1ab:P5402H) that emerged from below  
421 the limit of detection to high frequency over the course of infection. Importantly, S:Q677H  
422 emerged to 56.5% frequency on a day when the associated study participant had detectable  
423 infectious virus in a nasal swab (Ke et al., 2022b), suggesting the potential for this iSNV to be  
424 transmitted forward. Substitutions at S:Q677 (including Q677H) have independently emerged in  
425 multiple viral sub-lineages around the world, supporting that mutations at this site can be  
426 advantageous. We also observed signs of competition between S:Q677H and S:P681H within  
427 the same individual, with S:Q677H briefly emerging to a high frequency on a day at which the  
428 initially fixed S:P681H dipped in frequency. However, the observed reversion to a S:P681H-only

429 genotype after day 7 suggests that the selective advantage conferred by S:P681H is greater  
430 than that of S:Q677H. This fitness advantage is supported globally by the more widespread  
431 proliferation of S:P681H-containing lineages in comparison to S:Q677H (Hadfield et al., 2018).  
432 Our data demonstrate how, in rare cases, *de novo* generated variants can emerge to within-host  
433 frequencies sufficient for transmission during acute infection.

434  
435 In addition to the limited number of iSNVs that emerged to high frequency within single  
436 individuals, we observed several iSNVs that arose above background in multiple participants.  
437 Mapping the genomic locations of these shared mutations revealed several hotspots of non-  
438 synonymous mutation accumulation that differed between naïve and immune individuals. In  
439 naïve individuals, we identified hotspots at residues 402-457 in ORF1ab, and 655-681 in spike.  
440 The latter is especially interesting, as this region is directly adjacent to the S1/S2 cleavage site.  
441 Substitutions that modulate cleavage efficiency are important for transmission in ferrets  
442 (Peacock et al., 2021) and replication in cell culture (Johnson et al., 2021). S1/S2 cleavage site  
443 substitutions are characteristic features of the Omicron, Delta, and Alpha lineages, and have  
444 been shown to be responsible for Delta's increased relative fitness compared with Alpha (Liu et  
445 al., 2021a), suggesting the importance of this domain in the adaptation of SARS-CoV-2 to  
446 humans. The enrichment of amino acid substitutions immediately upstream of the S1/S2  
447 cleavage site in our cohort is further evidence that this region may be subject to stronger within-  
448 host selection in humans.

449  
450 We also observed a surprisingly high density of N gene substitutions in immune participants. An  
451 observed hotspot of mutation accumulation in N:199-204 matches up with previous  
452 observations of frequent changes at positions 201-205 in the serine-rich region of the gene,  
453 several of which are characteristic of emerging lineages. R203K and G204R substitutions (both  
454 of which we observed in our samples) can increase the relative fitness of the virus, potentially  
455 through increased phosphorylation of the nucleocapsid (Johnson et al., 2022). These  
456 substitutions have also been associated with the transcription of an alternate subgenomic  
457 mRNA with anti-interferon activity (Mears et al., 2022). While spike protein substitutions are  
458 clearly the primary drivers of SARS-CoV-2 adaptation to humans, our results are also consistent  
459 with previous data suggesting an important role for the N gene during human adaptation.

460  
461 Finally, several shared mutations occurred within untranslated regions of the viral genome. The  
462 most frequent of these was a t29760c substitution (in the 3' UTR), which reoccurred across 9  
463 different naïve individuals. We also observed recurring substitutions in the 5' UTR, and, in  
464 immune individuals, a recurring substitution and insertion in the untranslated region preceding  
465 the N gene. The untranslated regions of the coronavirus genome form secondary structures that  
466 play a role in viral replication and translation (Yang and Leibowitz, 2015). It remains to be seen  
467 whether the recurring UTR mutations that we observe have appreciable effects on viral fitness.

468  
469 Variant dynamics in multiple participants exhibited extreme fluctuations where iSNVs at or near  
470 fixation abruptly fall below the limit of detection, only to return to high frequencies days later.  
471 Given the abruptness of these fluctuations, it is doubtful that they were selection-driven. They  
472 could potentially be explained if there is a significant degree of spatial structuring of within-host  
473 viral genetic diversity, as has recently been described for influenza virus (Amato et al., 2022).  
474 Spatial structuring could promote more extreme, drift-driven fluctuations in sampled iSNV  
475 frequencies, due to bottleneck effects (Amato et al., 2022; Orton et al., 2020; Pfeiffer and  
476 Kirkegaard, 2006). Alternatively, these fluctuations might be artifactual, potentially arising from  
477 poor quality sampling of the viral population. We think the latter is unlikely, due to the Ct value



478 thresholds we used for including samples in our analyses, but we cannot formally rule this  
479 possibility out. Regardless, either explanation further emphasizes the advantages of longitudinal  
480 sampling, as single-timepoint snapshots of viral populations can present misleading views of the  
481 within-host landscape.

482  
483 Supporting the possibility that stochastic within-host SNV dynamics may partially result from  
484 spatial structuring, we observed significant compartmentalization between the oral and nasal  
485 environments over the course of SARS-CoV-2 infection in a subset of individuals. iSNVs varied  
486 in frequency between the two environments, a finding that builds on previous observations that  
487 peaks in viral shedding are often offset by several days between saliva and nasal environments  
488 (Ke et al., 2022a), and that shedding is sometimes limited to the saliva compartment in immune  
489 individuals (Ke et al., 2022b). These results suggest the potential for tissue-specific adaptation  
490 by the virus and reaffirm that sampling of a single tissue site may not provide a complete view of  
491 viral population diversity within a host.

492  
493 A clear advantage of repeated longitudinal sampling is that it allows for higher confidence  
494 variant calling compared with single-timepoint sampling. Across individual samples, we  
495 measured iSNV counts ranging from zero to several hundred and found that these values could  
496 shift rapidly within an individual over short periods of time. However, the number of variants  
497 shared across multiple days was consistent across both cohorts and remained relatively low,  
498 with both groups exhibiting shared iSNV counts that align with previous assessments of within-  
499 host diversity (Valesano et al. 2021; Lythgoe et al. 2021).

500  
501 Altogether, our results suggest that viral evolution is largely driven by stochastic forces during  
502 acute infections but that in rare occasions selection can drive the emergence of iSNVs capable  
503 of forward transmission. Furthermore, our recurrent detection of iSNVs that have been  
504 successful (or not) at the global scale indicate areas of alignment and discordance between  
505 within-host and between-host selective pressures and thus help shed light on the forces that  
506 shape global patterns of SARS-CoV-2 evolution.

## 507 508 **Acknowledgments**

509 This work has been generously supported by the National Heart, Lung, and Blood Institute of  
510 the National Institutes of Health award 3U54HL143541-02S2) through the RADx-Tech program  
511 to D.D.M., L.L.G. and C.B.B., as well as additional funds generously provided by the Carl R.  
512 Woese Institute for Genomic Biology and the Department of Microbiology at the University of  
513 Illinois at Urbana-Champaign.

514  
515 We are grateful to Alvaro Hernandez, Chris Wright, and the DNA services team at the Roy J.  
516 Carver Biotechnology Center for assistance in next generation sequencing.

517  
518 We gratefully acknowledge the Authors from the originating laboratories responsible for  
519 obtaining the specimens and the submitting laboratories where genetic sequence data were  
520 generated and shared via the GISAID Initiative, on which Fig S5 is based (**Table S1**)

## 521 522 **Declaration of interests**

523 The authors declare no competing interests.

## 524 525 **Methods**

526 *Sample collection*

527 To monitor on-campus COVID cases, students and employees at the University of Illinois at  
528 Urbana-Champaign were required to submit biweekly saliva samples for RTqPCR testing.  
529 Individuals who tested positive were given the option to enroll in a longitudinal sample collection  
530 study within 1 day of receiving a positive result. Additionally, individuals who been in close  
531 contact with a positive case were eligible to enroll in the same study within 5 days of their  
532 exposure. Enrolled participants then provided saliva samples and mid-turbinate nasal swabs for  
533 14 days after the date of their first positive test (This collection protocol is described in detail in  
534 (Ke et al., 2022a)) Within 12 hours of collection, RTqPCR was performed on heat-inactivated  
535 saliva samples to assess viral load, as described in Ranoa et al. (Ranoa et al., 2020). Nasal  
536 swab samples were stored in viral transport media at  $-80^{\circ}$  C and shipped to Johns Hopkins  
537 University for analysis.

538  
539 Participants were designated as fully vaccinated if they had been infected at least 14 days after  
540 receiving a single-dose vaccine (JNJ-78436735) or a second dose of a two-dose vaccine  
541 (BNT162b2 or mRNA-1273). If at least 14 days had passed since receiving the first dose of a  
542 two-dose vaccine, participants were designated as partially vaccinated, and if less than 14 days  
543 had passed since receiving a dose of any vaccine, participants were designated as newly  
544 vaccinated. Study enrollment was concluded prior to the approval of vaccine boosters.

#### 545 546 *Participant selection*

547 After RTqPCR analysis, unvaccinated participants with fewer than three saliva samples under  
548 the cycle threshold (Ct) cutoff value of 28 were filtered from the dataset. The remaining  
549 participants were sorted and ranked based on their number of quality samples and the range of  
550 dates covered by these samples. The top 20 participants were selected for further analysis. All  
551 immune participants with saliva samples under a Ct value of 30 were retained, which resulted in  
552 a study group of 12 individuals. From this combined cohort of naïve and immune individuals,  
553 nasal samples from 14 individuals were chosen to evaluate environmental differences between  
554 the oral and nasal cavities.

#### 555 556 *RNA extraction and sequencing (Saliva samples)*

557 To extract viral RNA, a volume of 140  $\mu$ L from each heat-inactivated saliva sample was  
558 processed using the QIAamp viral RNA mini kit. Viral cDNA was generated from 100 ng of the  
559 resulting RNA aliquots and sequencing libraries were prepared from the cDNA using the Swift  
560 SNAP Amplicon SARS-CoV-2 kit. Deep sequencing was then performed on an Illumina  
561 NovaSeq. Raw sequences were processed using the nf-core/viral-recon workflow, in order to  
562 align sequences to the Wuhan-Hu-1 reference genome and extract frequencies and annotations  
563 for variants at frequencies higher than 0.01. Lineages were assigned using *Pango* version  
564 1.2.34.

#### 565 566 *Analysis of variant dynamics (Saliva samples)*

567 Variants were extracted from sequences aligned to Wuhan-Hu-1 using *iVar*, and variant effects  
568 were annotated with *SnPEff*. To focus on minor sequence variants, variants present above a  
569 frequency of 0.97 were left out of the dataset. Variants at frequencies lower than 0.03 were also  
570 removed to decrease the potential for error due to noise. A per-nucleotide depth threshold of  
571 1000 reads was also applied to the dataset. For each participant, variants present across two or  
572 more days of infection were extracted, and their frequencies tracked. Though the depth and  
573 frequency cutoffs described above were used to identify these shared variants, frequency  
574 tracking was performed on a dataset curated without thresholds, to avoid cases in which  
575 variants crossing either threshold may erroneously appear to fall out of the dataset. Variants

576 with per-nucleotide coverage values below the cutoff were specially marked and plotted to  
577 indicate their low depth values. *SnpEff* annotations were used to characterize shared variants  
578 as synonymous, nonsynonymous, or untranslated, and to assign them to the appropriate region  
579 of the SARS-CoV-2 genome. Genome positions of variants were visualized using *trackViewer*  
580 package (version 1.28.1) in R (Ou and Zhu, 2019). The ratio of nonsynonymous to synonymous  
581 variants (dN/dS) was then calculated for each sample, using all variants above the depth  
582 threshold of 1000. Variant counts were normalized to an estimate of the number of  
583 nonsynonymous sites (9803) or synonymous sites (19606) in the genome, which were  
584 calculated by estimating that each codon contains one synonymous site. Infinite and NaN  
585 values were excluded from further analysis.

586

#### 587 *RNA extraction and sequencing (Nasal swab samples)*

588 Mid-turbinate nasal swab specimen aliquots were maintained at -80°C prior to use. RNA was  
589 extracted from 300 µl of clinical specimen using the Chemagic™ 360 system (Perkin Elmer)  
590 according to the manufacturer's specifications. RNA was eluted with 60µl elution buffer and  
591 stored at -80°C until use. cDNA synthesis was performed using Superscript IV reverse  
592 transcriptase Kit (ThermoFisher Scientific) following the manufacturer's protocol. The  
593 amplification of the genome was performed using Q5 Hot Start DNA Polymerase  
594 (ThermoFisher) and two pools of primers, each containing unique non-overlapping binding sites  
595 covering half of the SARS-CoV-2 genome. Library preparation was performed following the  
596 protocol provided with the Illumina Nextera DNA Flex kit for sample inputs of 100-500ng.  
597 Briefly, adapter sequences were ligated to genomic DNA fragments via Tagmentation, after  
598 which mean amplicon size was determined via Agilent TapeStation 4500 and concentration was  
599 determined using a Qubit Flex Fluorometer (Invitrogen). Size normalization was performed and  
600 samples were diluted to a loading concentration of 1.2-1.3pM. Samples were sequenced using  
601 Illumina MiniSeq High Output Reagents (150 cycles).

602

#### 603 *Analysis of genetic compartmentalization between sample sites*

604 To account for sequencing differences between saliva samples and nasal swab samples (which  
605 were processed at different facilities), we imposed varying quality control thresholds on each  
606 dataset. To remove potentially artefactual iSNVs, we imposed a per-nucleotide depth cutoff of  
607 500 reads in saliva samples and 200 reads in nasal swab samples. To remove samples with low  
608 overall coverage, we imposed a mean coverage cutoff of 1000 on saliva samples and a median  
609 coverage cutoff of 200 on nasal samples. We assigned SNPs present below a threshold of 1% a  
610 frequency of 0, and those present above a threshold of 99% a frequency of 1. Because nasal  
611 swab samples were sequenced using ARTIC primers, we also filtered out common SNP  
612 artifacts that arise frequently with this primer set (2020b). In one individual (451709), we also  
613 excluded samples from days 4 and 7, due to evidence of possible cross-contamination. For  
614 each participant, pairwise  $F_{ST}$  values were calculated for all possible pairs of samples, including  
615 pairs of saliva samples, pairs of nasal samples, and pairs of one saliva sample and one nasal  
616 sample.

617

#### 618 *Phylogenetic analysis*

619 The metadata file for all sequences present in the GISAID EpiCov database (10.2807/1560-  
620 7917.ES.2017.22.13.30494) was downloaded on June 10th, 2022. This metadata file was was  
621 filtered to include only entries from human hosts, only complete and high coverage entries, and  
622 only those with complete sampling dates. The filtered metadata entries were downsampled to at  
623 most 100 per month. Downsampling was conducted in Python v3.9.4 (Van Rossum and Drake,  
624 2009) using Pandas v1.1.4 (10.5281/zenodo.3509134) and Numpy v1.19.4 (10.1038/s41586-

625 020-2649-2). The selected sequences were downloaded from GISAID EpiCov and aligned to  
626 Wuhan/WIV04 (EPI\_ISL\_402124) using MAFFT v7.464 (10.1093/molbev/mst010), removing  
627 any insertions to the reference. IQtree v2.1.3 (10.1093/molbev/msaa015) was used to infer a  
628 phylogenetic tree of the aligned sequences using a GTR+G4 substitution model, saving with  
629 Wuhan/WIV04 as the outgroup. TreeTime v0.8.0 (10.1093/ve/vex042) was used to filter  
630 sequences to include only those falling within four interquartile ranges of the best fit molecular  
631 clock, rooting at Wuhan/WIV04. Wuhan/WIV04 was forced to be included in the filtered tree and  
632 no other tips were identified as failing this filter.

633  
634 For each of the amino acids of interest (ORF1ab R124, ORF1ab S1150, ORF1ab P5402), we  
635 first identified the corresponding nucleotide positions and then identified the nucleotide identity  
636 at each of those sites for each sequence in the alignment. These nucleotide identities were  
637 used to infer the amino acid for each sequence at each position. Note that this method does not  
638 account for the presence of frame shift mutations, however, we expect these to be sufficiently  
639 rare as to not bias our results.

640  
641 For each of the four substitutions we plotted the downsampled phylogenetic tree, labeling any  
642 tips with amino acids that did not match the reference. Any tips in which any of the nucleotides  
643 in the codon of interest were deleted or ambiguously genotyped were ignored. Visualization was  
644 done in Python using Matplotlib v3.5.1 (10.1109/MCSE.2007.55) and Baltic v0.1.5  
645 [<https://github.com/evogytis/baltic>].

646  
647 *Substitution frequency analysis*  
648 The GISAID EpiCoV "MSA full" alignment was downloaded on June 2nd, 2022. All sequences in  
649 this file have been aligned to Wuhan/WIV04 using MAFFT, retaining any insertions relative to  
650 the reference. Full details on how this file were generated are available from GISAID.

651  
652 For each of the four amino acid positions of interest we first identified the corresponding  
653 nucleotide positions in the gapped alignment and identified the nucleotides at each of these for  
654 each position. These nucleotides were used to infer the amino acid for each sequence in the full  
655 alignment at each position. Similar to above, this method does not account for frameshift  
656 mutations.

657  
658 For each amino acid position, we identified the percentage of sequences harboring non-  
659 reference amino acids per month, ignoring any sequences in each one of the nucleotides was  
660 deleted or ambiguously genotyped. All amino acid identifies with a maximum monthly frequency  
661 less than or equal to 0.01% were grouped into an "Other" category. This analysis was  
662 conducted in Python using Pandas and visualized with Matplotlib.

663  
664 **References:**

665 Amato, K.A., Haddock, L.A., Braun, K.M., Meliopoulos, V., Livingston, B., Honce, R., Schaack,  
666 G.A., Boehm, E., Higgins, C.A., Barry, G.L., et al. (2022). Influenza A virus undergoes  
667 compartmentalized replication in vivo dominated by stochastic bottlenecks. *Nat Commun* 13,  
668 3416. <https://doi.org/10.1038/s41467-022-31147-0>.

669 Avanzato, V.A., Matson, M.J., Seifert, S.N., Pryce, R., Williamson, B.N., Anzick, S.L., Barbian,  
670 K., Judson, S.D., Fischer, E.R., Martens, C., et al. (2020). Case Study: Prolonged Infectious

- 671 SARS-CoV-2 Shedding from an Asymptomatic Immunocompromised Individual with Cancer.  
672 *Cell* *183*, 1901-1912.e9. <https://doi.org/10.1016/j.cell.2020.10.049>.
- 673 Baang, J.H., Smith, C., Mirabelli, C., Valesano, A.L., Manthei, D.M., Bachman, M.A., Wobus,  
674 C.E., Adams, M., Washer, L., Martin, E.T., et al. (2021). Prolonged Severe Acute Respiratory  
675 Syndrome Coronavirus 2 Replication in an Immunocompromised Patient. *The Journal of*  
676 *Infectious Diseases* *223*, 23–27. <https://doi.org/10.1093/infdis/jiaa666>.
- 677 Braun, K.M., Moreno, G.K., Wagner, C., Accola, M.A., Rehrauer, W.M., Baker, D.A., Koelle, K.,  
678 O'Connor, D.H., Bedford, T., Friedrich, T.C., et al. (2021). Acute SARS-CoV-2 infections harbor  
679 limited within-host diversity and transmit via tight transmission bottlenecks. *PLOS Pathogens*  
680 *17*, e1009849. <https://doi.org/10.1371/journal.ppat.1009849>.
- 681 Choi, B., Choudhary, M.C., Regan, J., Sparks, J.A., Padera, R.F., Qiu, X., Solomon, I.H., Kuo,  
682 H.-H., Boucau, J., Bowman, K., et al. (2020). Persistence and Evolution of SARS-CoV-2 in an  
683 Immunocompromised Host. *N Engl J Med* *383*, 2291–2293.  
684 <https://doi.org/10.1056/NEJMc2031364>.
- 685 Cobey, S., Larremore, D.B., Grad, Y.H., and Lipsitch, M. (2021). Concerns about SARS-CoV-2  
686 evolution should not hold back efforts to expand vaccination. *Nature Reviews Immunology* 1–6.  
687 <https://doi.org/10.1038/s41577-021-00544-9>.
- 688 Colson, P., Delerce, J., Burel, E., Beye, M., Fournier, P.-E., Levasseur, A., Lagier, J.-C., and  
689 Raoult, D. (2022). Occurrence of a substitution or deletion of SARS-CoV-2 spike amino acid 677  
690 in various lineages in Marseille, France. *Virus Genes* *58*, 53–58. [https://doi.org/10.1007/s11262-](https://doi.org/10.1007/s11262-021-01877-2)  
691 [021-01877-2](https://doi.org/10.1007/s11262-021-01877-2).
- 692 Corey, L., Beyrer, C., Cohen, M.S., Michael, N.L., Bedford, T., and Rolland, M. (2021). SARS-  
693 CoV-2 Variants in Patients with Immunosuppression. *New England Journal of Medicine* *385*,  
694 562–566. <https://doi.org/10.1056/NEJMs2104756>.
- 695 Debbink, K., McCrone, J.T., Petrie, J.G., Truscon, R., Johnson, E., Mantlo, E.K., Monto, A.S.,  
696 and Luring, A.S. (2017). Vaccination has minimal impact on the intrahost diversity of H3N2  
697 influenza viruses. *PLOS Pathogens* *13*, e1006194.  
698 <https://doi.org/10.1371/journal.ppat.1006194>.
- 699 Ghosh, A.K., Kaiser, M., Molla, Md.M.A., Nafisa, T., Yeasmin, M., Ratul, R.H., Sharif, Md.M.,  
700 Akram, A., Hosen, N., Mamunur, R., et al. (2021). Molecular and Serological Characterization of  
701 the SARS-CoV-2 Delta Variant in Bangladesh in 2021. *Viruses* *13*, 2310.  
702 <https://doi.org/10.3390/v13112310>.
- 703 Hadfield, J., Megill, C., Bell, S.M., Huddleston, J., Potter, B., Callender, C., Sagulenko, P.,  
704 Bedford, T., and Neher, R.A. (2018). Nextstrain: real-time tracking of pathogen evolution.  
705 *Bioinformatics* *34*, 4121–4123. <https://doi.org/10.1093/bioinformatics/bty407>.
- 706 Harvey, W.T., Carabelli, A.M., Jackson, B., Gupta, R.K., Thomson, E.C., Harrison, E.M.,  
707 Ludden, C., Reeve, R., Rambaut, A., Peacock, S.J., et al. (2021). SARS-CoV-2 variants, spike  
708 mutations and immune escape. *Nat Rev Microbiol* *19*, 409–424. [https://doi.org/10.1038/s41579-](https://doi.org/10.1038/s41579-021-00573-0)  
709 [021-00573-0](https://doi.org/10.1038/s41579-021-00573-0).



- 710 Hodcroft, E.B., Domman, D.B., Snyder, D.J., Oguntuyo, K.Y., Diest, M.V., Densmore, K.H.,  
711 Schwalm, K.C., Femling, J., Carroll, J.L., Scott, R.S., et al. (2021). Emergence in late 2020 of  
712 multiple lineages of SARS-CoV-2 Spike protein variants affecting amino acid position 677.  
713 2021.02.12.21251658. <https://doi.org/10.1101/2021.02.12.21251658>.
- 714 Johnson, B.A., Xie, X., Bailey, A.L., Kalveram, B., Lokugamage, K.G., Muruato, A., Zou, J.,  
715 Zhang, X., Juelich, T., Smith, J.K., et al. (2021). Loss of furin cleavage site attenuates SARS-  
716 CoV-2 pathogenesis. *Nature* 591, 293–299. <https://doi.org/10.1038/s41586-021-03237-4>.
- 717 Johnson, B.A., Zhou, Y., Lokugamage, K.G., Vu, M.N., Bopp, N., Crocquet-Valdes, P.A.,  
718 Kalveram, B., Schindewolf, C., Liu, Y., Scharon, D., et al. (2022). Nucleocapsid mutations in  
719 SARS-CoV-2 augment replication and pathogenesis. *PLoS Pathog* 18, e1010627.  
720 <https://doi.org/10.1371/journal.ppat.1010627>.
- 721 Ke, R., Martinez, P.P., Smith, R.L., Gibson, L.L., Mirza, A., Conte, M., Gallagher, N., Luo, C.H.,  
722 Jarrett, J., Zhou, R., et al. (2022a). Daily longitudinal sampling of SARS-CoV-2 infection reveals  
723 substantial heterogeneity in infectiousness. *Nat Microbiol* 7, 640–652.  
724 <https://doi.org/10.1038/s41564-022-01105-z>.
- 725 Ke, R., Martinez, P.P., Smith, R.L., Gibson, L.L., Achenbach, C.J., McFall, S., Qi, C., Jacob, J.,  
726 Dembele, E., Bundy, C., et al. (2022b). Longitudinal analysis of SARS-CoV-2 vaccine  
727 breakthrough infections reveal limited infectious virus shedding and restricted tissue distribution.  
728 *Open Forum Infectious Diseases* ofac192. <https://doi.org/10.1093/ofid/ofac192>.
- 729 Kemp, S.A., Collier, D.A., Datir, R.P., Ferreira, I.A.T.M., Gayed, S., Jahun, A., Hosmillo, M.,  
730 Rees-Spear, C., Mlcochova, P., Lumb, I.U., et al. (2021). SARS-CoV-2 evolution during  
731 treatment of chronic infection. *Nature* 592, 277–282. [https://doi.org/10.1038/s41586-021-03291-](https://doi.org/10.1038/s41586-021-03291-y)  
732 *y*.
- 733 Kryazhimskiy, S., and Plotkin, J.B. (2008). The Population Genetics of dN/dS. *PLoS Genet* 4,  
734 e1000304. <https://doi.org/10.1371/journal.pgen.1000304>.
- 735 Liu, Y., Liu, J., Johnson, B.A., Xia, H., Ku, Z., Schindewolf, C., Widen, S.G., An, Z., Weaver,  
736 S.C., Menachery, V.D., et al. (2021a). Delta spike P681R mutation enhances SARS-CoV-2  
737 fitness over Alpha variant.
- 738 Liu, Z., VanBlargan, L.A., Bloyet, L.-M., Rothlauf, P.W., Chen, R.E., Stumpf, S., Zhao, H.,  
739 Errico, J.M., Theel, E.S., Liebeskind, M.J., et al. (2021b). Identification of SARS-CoV-2 spike  
740 mutations that attenuate monoclonal and serum antibody neutralization. *Cell Host & Microbe* 29,  
741 477-488.e4. <https://doi.org/10.1016/j.chom.2021.01.014>.
- 742 Lythgoe, K.A., Hall, M., Ferretti, L., de Cesare, M., MacIntyre-Cockett, G., Trebes, A.,  
743 Andersson, M., Otecko, N., Wise, E.L., Moore, N., et al. (2021). SARS-CoV-2 within-host  
744 diversity and transmission. *Science* 372, eabg0821. <https://doi.org/10.1126/science.abg0821>.
- 745 Martin, M.A., and Koelle, K. (2021). Comment on “Genomic epidemiology of superspreading  
746 events in Austria reveals mutational dynamics and transmission properties of SARS-CoV-2.”  
747 *Sci. Transl. Med.* 13, eabh1803. <https://doi.org/10.1126/scitranslmed.abh1803>.

- 748 Mears, H.V., Young, G.R., Sanderson, T., Harvey, R., Crawford, M., Snell, D.M., Fowler, A.S.,  
749 Hussain, S., Nicod, J., Peacock, T.P., et al. (2022). Emergence of new subgenomic mRNAs in  
750 SARS-CoV-2. *19*. .
- 751 Orton, R.J., Wright, C.F., King, D.P., and Haydon, D.T. (2020). Estimating viral bottleneck sizes  
752 for FMDV transmission within and between hosts and implications for the rate of viral evolution.  
753 *Interface Focus 10*, 20190066. <https://doi.org/10.1098/rsfs.2019.0066>.
- 754 Ou, J., and Zhu, L.J. (2019). trackViewer: a Bioconductor package for interactive and integrative  
755 visualization of multi-omics data. *Nat Methods 16*, 453–454. [https://doi.org/10.1038/s41592-](https://doi.org/10.1038/s41592-019-0430-y)  
756 [019-0430-y](https://doi.org/10.1038/s41592-019-0430-y).
- 757 Peacock, T.P., Goldhill, D.H., Zhou, J., Baillon, L., Frise, R., Swann, O.C., Kugathasan, R.,  
758 Penn, R., Brown, J.C., Sanchez-David, R.Y., et al. (2021). The furin cleavage site in the SARS-  
759 CoV-2 spike protein is required for transmission in ferrets. *Nat Microbiol 6*, 899–909.  
760 <https://doi.org/10.1038/s41564-021-00908-w>.
- 761 Pfeiffer, J.K., and Kirkegaard, K. (2006). Bottleneck-mediated quasispecies restriction during  
762 spread of an RNA virus from inoculation site to brain. *Proceedings of the National Academy of*  
763 *Sciences 103*, 5520–5525. <https://doi.org/10.1073/pnas.0600834103>.
- 764 Ranoa, D.R.E., Holland, R.L., Alnaji, F.G., Green, K.J., Wang, L., Brooke, C.B., Burke, M.D.,  
765 Fan, T.M., and Hergenrother, P.J. (2020). Saliva-Based Molecular Testing for SARS-CoV-2 that  
766 Bypasses RNA Extraction. 2020.06.18.159434. <https://doi.org/10.1101/2020.06.18.159434>.
- 767 Ranoa, D.R.E., Holland, R.L., Alnaji, F.G., Green, K.J., Wang, L., Fredrickson, R.L., Wang, T.,  
768 Wong, G.N., Uelmen, J., Maslov, S., et al. (2021). Mitigation of SARS-CoV-2 Transmission at a  
769 Large Public University (Infectious Diseases (except HIV/AIDS)).
- 770 Saad-Roy, C.M., Morris, S.E., Metcalf, C.J.E., Mina, M.J., Baker, R.E., Farrar, J., Holmes, E.C.,  
771 Pybus, O.G., Graham, A.L., Levin, S.A., et al. (2021). Epidemiological and evolutionary  
772 considerations of SARS-CoV-2 vaccine dosing regimes. *Science 372*, 363–370.  
773 <https://doi.org/10.1126/science.abg8663>.
- 774 Saxena, S.K., Kumar, S., Ansari, S., Paweska, J.T., Maurya, V.K., Tripathi, A.K., and Abdel-  
775 Moneim, A.S. (2022). Characterization of the novel SARS-CoV-2 Omicron (B.1.1.529) variant of  
776 concern and its global perspective. *Journal of Medical Virology 94*, 1738–1744.  
777 <https://doi.org/10.1002/jmv.27524>.
- 778 Smith, R.L., Gibson, L.L., Martinez, P.P., Ke, R., Mirza, A., Conte, M., Gallagher, N., Conte, A.,  
779 Wang, L., Fredrickson, R., et al. (2021). Longitudinal Assessment of Diagnostic Test  
780 Performance Over the Course of Acute SARS-CoV-2 Infection. *The Journal of Infectious*  
781 *Diseases 224*, 976–982. <https://doi.org/10.1093/infdis/jiab337>.
- 782 Tonkin-Hill, G., Martincorena, I., Amato, R., Lawson, A.R., Gerstung, M., Johnston, I., Jackson,  
783 D.K., Park, N., Lensing, S.V., Quail, M.A., et al. (2021). Patterns of within-host genetic diversity  
784 in SARS-CoV-2. *ELife 10*, e66857. <https://doi.org/10.7554/eLife.66857>.
- 785 Truong, T.T., Ryutov, A., Pandey, U., Yee, R., Goldberg, L., Bhojwani, D., Aguayo-Hiraldo, P.,  
786 Pinsky, B.A., Pekosz, A., Shen, L., et al. (2021). Increased viral variants in children and young

- 787 adults with impaired humoral immunity and persistent SARS-CoV-2 infection: A consecutive  
788 case series. *EBioMedicine* 67, 103355. <https://doi.org/10.1016/j.ebiom.2021.103355>.
- 789 Valesano, A.L., Rumfelt, K.E., Dimcheff, D.E., Blair, C.N., Fitzsimmons, W.J., Petrie, J.G.,  
790 Martin, E.T., and Luring, A.S. (2021). Temporal dynamics of SARS-CoV-2 mutation  
791 accumulation within and across infected hosts. *PLOS Pathogens* 17, e1009499.  
792 <https://doi.org/10.1371/journal.ppat.1009499>.
- 793 Van Rossum, G., and Drake, F.L. (2009). *Python 3 Reference Manual* (Scotts Valley, CA:  
794 CreateSpace).
- 795 Yang, D., and Leibowitz, J.L. (2015). The structure and functions of coronavirus genomic 3' and  
796 5' ends. *Virus Research* 206, 120–133. <https://doi.org/10.1016/j.virusres.2015.02.025>.
- 797 (2020a). Preliminary genomic characterisation of an emergent SARS-CoV-2 lineage in the UK  
798 defined by a novel set of spike mutations - SARS-CoV-2 coronavirus / nCoV-2019 Genomic  
799 Epidemiology.
- 800 (2020b). Issues with SARS-CoV-2 sequencing data - SARS-CoV-2 coronavirus / nCoV-2019  
801 Genomic Epidemiology.
- 802
- 803

804 **Supplemental Figures:**  
805

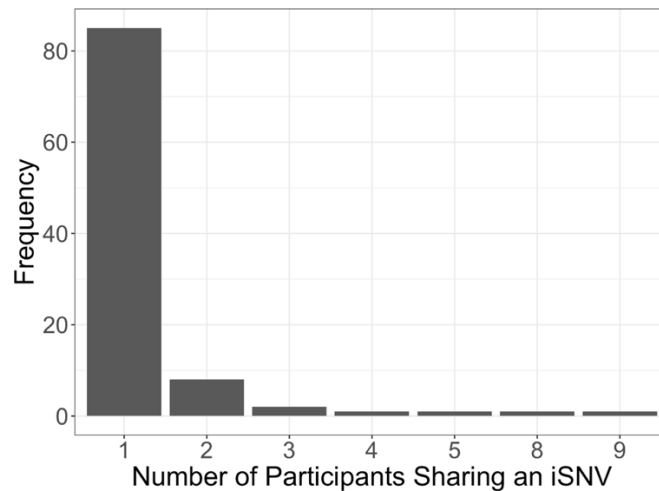

806  
807  
808  
809  
810

***Supplemental Figure 1: Distribution of shared iSNVs found across multiple naive participants. No shared iSNVs were detected in more than 2 vaccinated participants.***

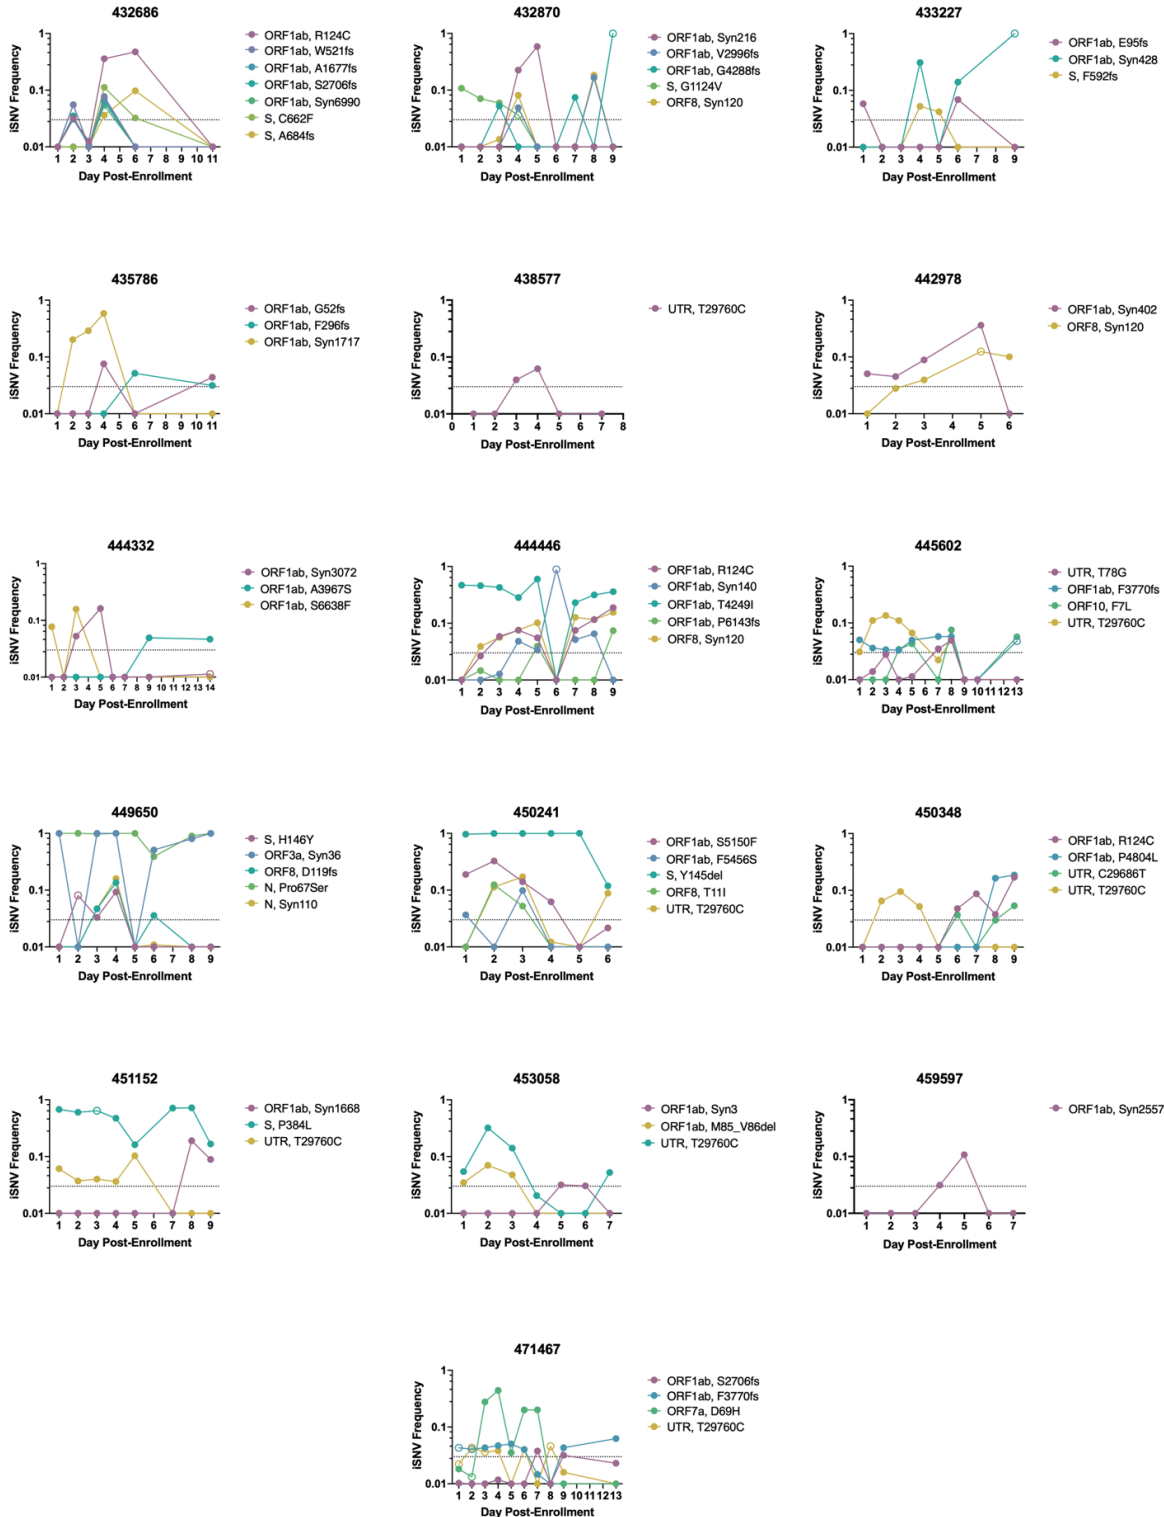

811  
812  
813  
814  
815  
816

**Supplemental Figure 2: iSNV dynamics over time from all unvaccinated participants.** Frequency tracking of selected iSNVs in unvaccinated participants. Dashed line marks frequency threshold of 0.03. Unfilled points mark iSNVs with read depths below the threshold of 1000 reads.



817

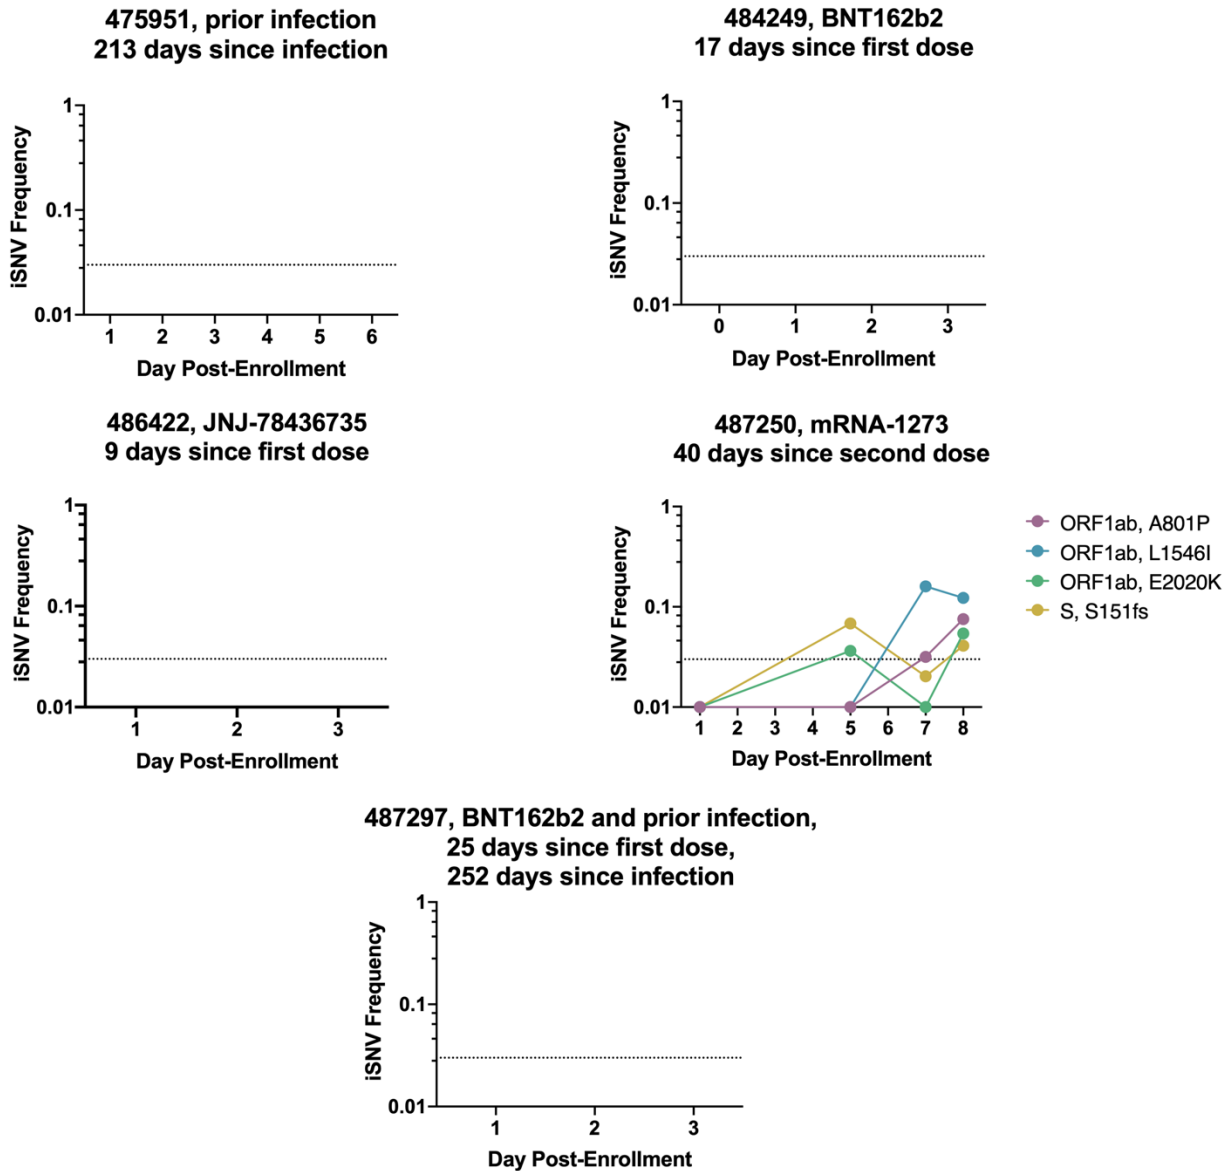

818

819

820 **Supplemental Figure 3: iSNV dynamics over time from all immune participants.** Frequency  
821 tracking of selected iSNVs in immune participants. Dashed line marks frequency threshold of  
822 0.03. Unfilled points mark iSNVs with read depths below the threshold of 1000 reads.

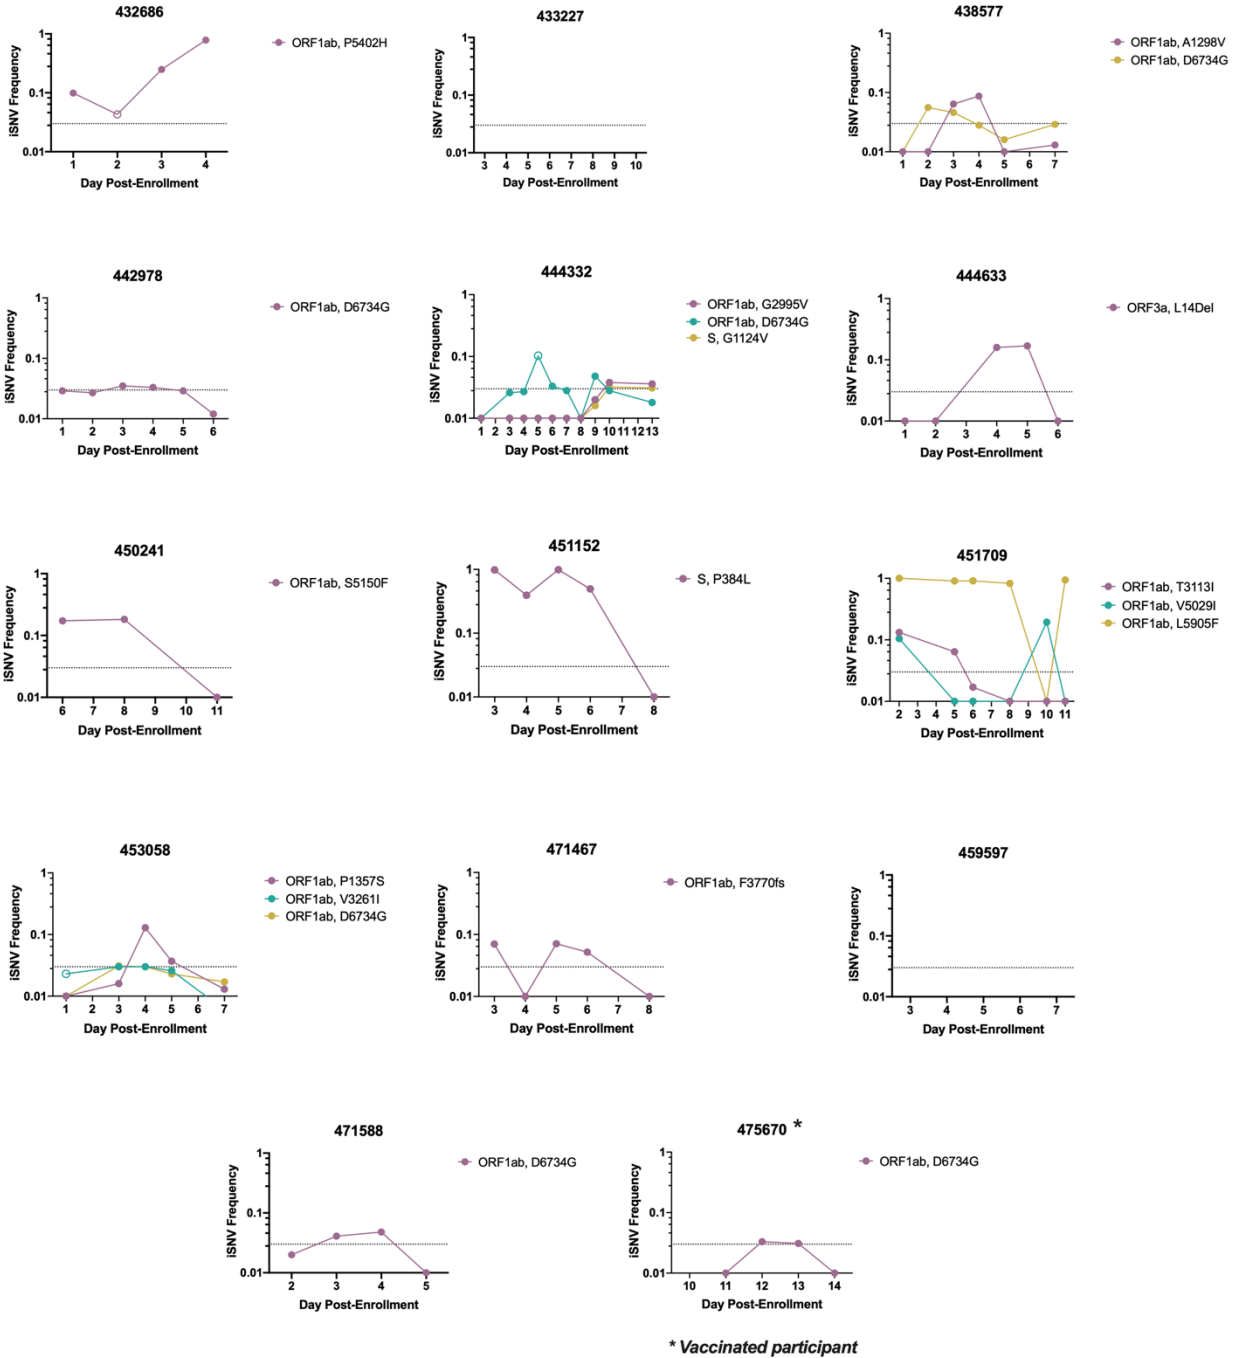

823  
824  
825  
826  
827

**Supplemental Figure 4: iSNV dynamics over time from all nasal samples.** Frequency tracking of selected iSNVs from nasal swab samples. Dashed line marks frequency threshold of 0.03. Unfilled points mark iSNVs with read depths below the threshold of 1000 reads.

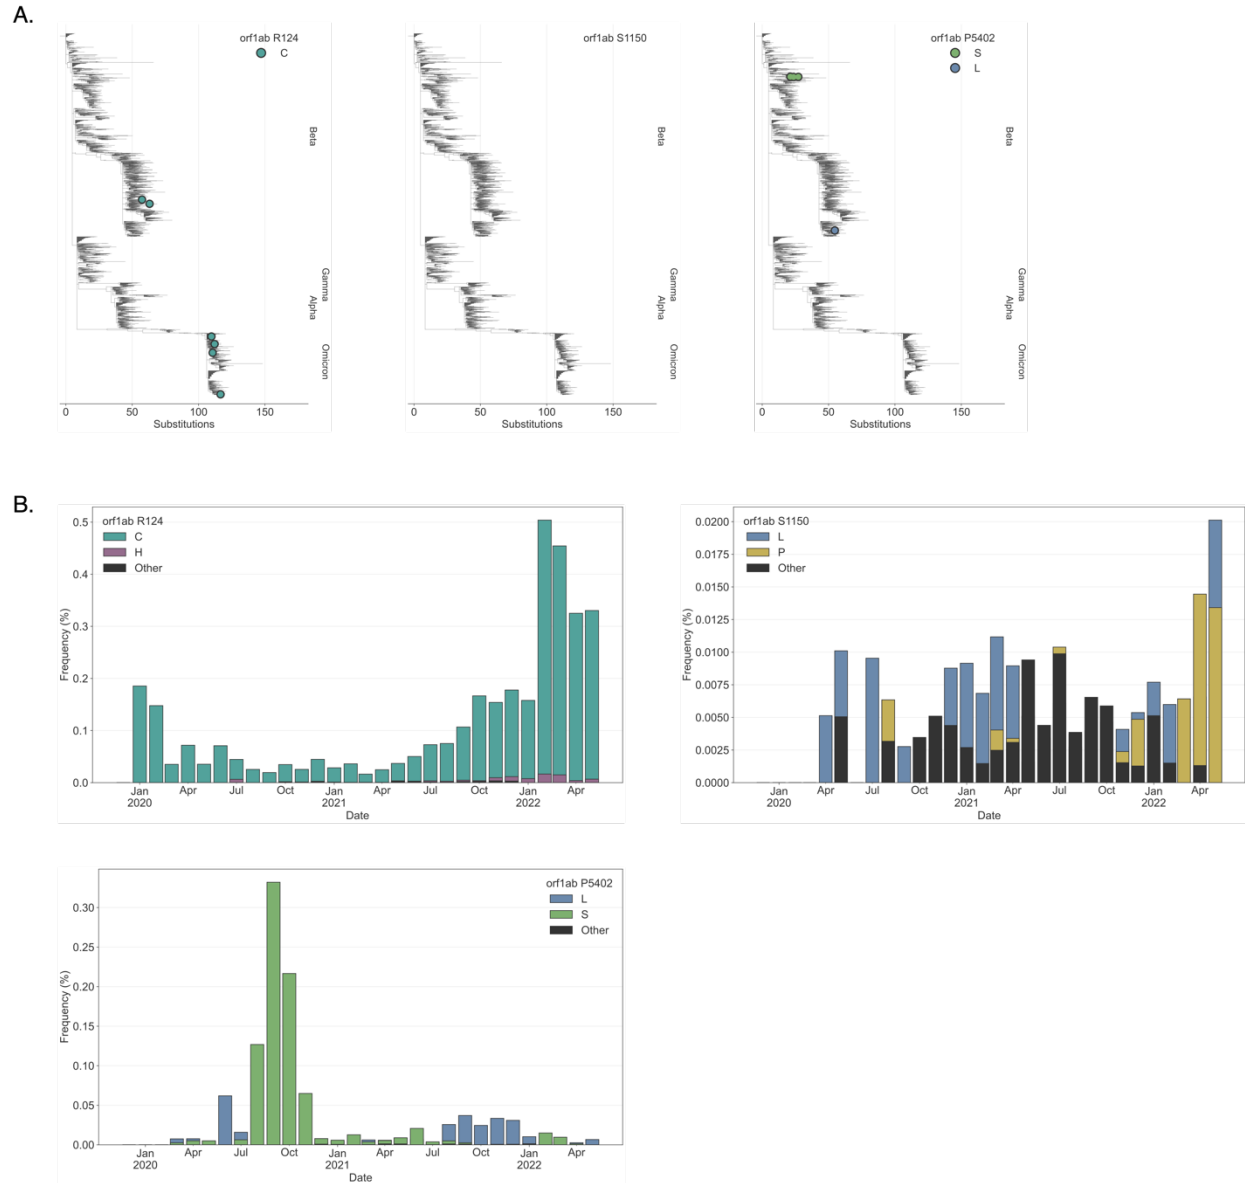

828  
829  
830  
831  
832  
833

**Supplemental Figure 5. Global occurrence of selected iSNVs. (A)** iSNV-associated amino acid changes plotted on a downsampled (100 sequences per month) global phylogeny of SARS-CoV-2 sequences. **(B)** Frequency of iSNV-associated amino acid changes from January 2020 to April 2022 in all quality filtered SARS-CoV-2 sequences.
